# Supplementary material for: Uptake of small extracellular vesicles by recipient cells is facilitated by paracrine adhesion signaling
Source: Springer Nature journal article supplement (doi:10.1038/s41467-025-57617-9), 2025-03-12
Supplement: MOESM11 [file 41467_2025_57617_MOESM11_ESM.pdf]

Reporting Summary

Nature Portfolio wishes to improve the reproducibility of the work that we publish. This form provides structure for consistency and transparency in reporting. For further information on Nature Portfolio policies, see our [Editorial Policies](#) and the [Editorial Policy Checklist](#).

Statistics

For all statistical analyses, confirm that the following items are present in the figure legend, table legend, main text, or Methods section.

- |                                     |                                                                                                                                                                                                                                                                                                |
|-------------------------------------|------------------------------------------------------------------------------------------------------------------------------------------------------------------------------------------------------------------------------------------------------------------------------------------------|
| n/a                                 | Confirmed                                                                                                                                                                                                                                                                                      |
| <input type="checkbox"/>            | <input checked="" type="checkbox"/> The exact sample size ( <i>n</i> ) for each experimental group/condition, given as a discrete number and unit of measurement                                                                                                                               |
| <input type="checkbox"/>            | <input checked="" type="checkbox"/> A statement on whether measurements were taken from distinct samples or whether the same sample was measured repeatedly                                                                                                                                    |
| <input type="checkbox"/>            | <input checked="" type="checkbox"/> The statistical test(s) used AND whether they are one- or two-sided<br><i>Only common tests should be described solely by name; describe more complex techniques in the Methods section.</i>                                                               |
| <input type="checkbox"/>            | <input checked="" type="checkbox"/> A description of all covariates tested                                                                                                                                                                                                                     |
| <input type="checkbox"/>            | <input checked="" type="checkbox"/> A description of any assumptions or corrections, such as tests of normality and adjustment for multiple comparisons                                                                                                                                        |
| <input type="checkbox"/>            | <input checked="" type="checkbox"/> A full description of the statistical parameters including central tendency (e.g. means) or other basic estimates (e.g. regression coefficient) AND variation (e.g. standard deviation) or associated estimates of uncertainty (e.g. confidence intervals) |
| <input type="checkbox"/>            | <input checked="" type="checkbox"/> For null hypothesis testing, the test statistic (e.g. <i>F</i> , <i>t</i> , <i>r</i> ) with confidence intervals, effect sizes, degrees of freedom and <i>P</i> value noted<br><i>Give <i>P</i> values as exact values whenever suitable.</i>              |
| <input checked="" type="checkbox"/> | <input type="checkbox"/> For Bayesian analysis, information on the choice of priors and Markov chain Monte Carlo settings                                                                                                                                                                      |
| <input type="checkbox"/>            | <input checked="" type="checkbox"/> For hierarchical and complex designs, identification of the appropriate level for tests and full reporting of outcomes                                                                                                                                     |
| <input type="checkbox"/>            | <input checked="" type="checkbox"/> Estimates of effect sizes (e.g. Cohen's <i>d</i> , Pearson's <i>r</i> ), indicating how they were calculated                                                                                                                                               |

Our web collection on [statistics for biologists](#) contains articles on many of the points above.

Software and code

Policy information about [availability of computer code](#)

|                 |                                                                                                                                                                                                                                                                                                                                                                                                                                                                                                            |
|-----------------|------------------------------------------------------------------------------------------------------------------------------------------------------------------------------------------------------------------------------------------------------------------------------------------------------------------------------------------------------------------------------------------------------------------------------------------------------------------------------------------------------------|
| Data collection | Western blot data: FUSION SOLO 7S.<br>Confocal microscopy:FV-1000D(Olympus).<br>TIRF microscopy:Home-built single-molecule imaging station built on Olympus IX-83 (Olympus) and Nikon Ti-E.<br>Single fluorescent-molecule tracking: WinTrack, WinATR, and WinSAT, produced in house (Komura et al., Nat. Chem. Biol. 2016; Kinoshita et al., J. Cell Biol. 2017; Morise et al., Nat. Commun. 2019)<br>Acquisitions of super-resolution microscopic images: ThunderSTORM plugin of Fiji (ver. 2.1.0/1.54f) |
| Data analysis   | Western blot images:<br>Data were analysed by Fiji (ver. 2.1.0/1.53c).<br>Confocal microscopy images:<br>Data were analysed by Fiji (ver. 2.1.0/1.53c)<br>Analysis of super-resolution microscopic images:<br>All the software used is described in the Methods section. Data and code availability statement is now placed as an independent Subsection with the heading "Data and materials availability" .<br>Statistical analysis; Origin Pro 2018b (OriginLab)                                        |

For manuscripts utilizing custom algorithms or software that are central to the research but not yet described in published literature, software must be made available to editors and reviewers. We strongly encourage code deposition in a community repository (e.g. GitHub). See the Nature Portfolio [guidelines for submitting code & software](#) for further information.

## Data

Policy information about [availability of data](#)

All manuscripts must include a [data availability statement](#). This statement should provide the following information, where applicable:

- Accession codes, unique identifiers, or web links for publicly available datasets
- A description of any restrictions on data availability
- For clinical datasets or third party data, please ensure that the statement adheres to our [policy](#)

A full data availability statements is included in the manuscript

## Research involving human participants, their data, or biological material

Policy information about studies with [human participants or human data](#). See also policy information about [sex, gender \(identity/presentation\), and sexual orientation](#) and [race, ethnicity and racism](#).

Reporting on sex and gender

N.A.

Reporting on race, ethnicity, or other socially relevant groupings

N.A.

Population characteristics

N.A.

Recruitment

N.A.

Ethics oversight

N.A.

Note that full information on the approval of the study protocol must also be provided in the manuscript.

## Field-specific reporting

Please select the one below that is the best fit for your research. If you are not sure, read the appropriate sections before making your selection.

☒ Life sciences ☐ Behavioural & social sciences ☐ Ecological, evolutionary & environmental sciences

For a reference copy of the document with all sections, see [nature.com/documents/nr-reporting-summary-flat.pdf](https://www.nature.com/documents/nr-reporting-summary-flat.pdf)

## Life sciences study design

All studies must disclose on these points even when the disclosure is negative.

Sample size

We performed pilot experiments using smaller sample numbers, and after performing Student t-test, we determined the expected minimal sample size to prove or disprove the hypothesis. We generally did more experiments than this minimal number of experiments.

Data exclusions

No data exclusions.

Replication

All experimental findings were reliably reproduced.

Randomization

All sample allocations were random.

Blinding

The sample preparation and observation were mostly preformed by the same operator. Therefore, no blinding was performed.

## Reporting for specific materials, systems and methods

We require information from authors about some types of materials, experimental systems and methods used in many studies. Here, indicate whether each material, system or method listed is relevant to your study. If you are not sure if a list item applies to your research, read the appropriate section before selecting a response.

## Materials &amp; experimental systems

## Methods

|                                     |                                                           |
|-------------------------------------|-----------------------------------------------------------|
| n/a                                 | Involved in the study                                     |
| <input type="checkbox"/>            | <input checked="" type="checkbox"/> Antibodies            |
| <input type="checkbox"/>            | <input checked="" type="checkbox"/> Eukaryotic cell lines |
| <input checked="" type="checkbox"/> | <input type="checkbox"/> Palaeontology and archaeology    |
| <input checked="" type="checkbox"/> | <input type="checkbox"/> Animals and other organisms      |
| <input checked="" type="checkbox"/> | <input type="checkbox"/> Clinical data                    |
| <input type="checkbox"/>            | <input type="checkbox"/> Dual use research of concern     |
| <input checked="" type="checkbox"/> | <input type="checkbox"/> Plants                           |

|                                     |                                                    |
|-------------------------------------|----------------------------------------------------|
| n/a                                 | Involved in the study                              |
| <input checked="" type="checkbox"/> | <input type="checkbox"/> ChIP-seq                  |
| <input type="checkbox"/>            | <input checked="" type="checkbox"/> Flow cytometry |
| <input checked="" type="checkbox"/> | <input type="checkbox"/> MRI-based neuroimaging    |

## Antibodies

|                 |                                                                                                                                                                                                                                                                                                                                                                                                                                                                                                                                                                                                                                                                                                                                                                                                                                                                                                                |
|-----------------|----------------------------------------------------------------------------------------------------------------------------------------------------------------------------------------------------------------------------------------------------------------------------------------------------------------------------------------------------------------------------------------------------------------------------------------------------------------------------------------------------------------------------------------------------------------------------------------------------------------------------------------------------------------------------------------------------------------------------------------------------------------------------------------------------------------------------------------------------------------------------------------------------------------|
| Antibodies used | anti-CD63 (Cosmo Bio, SHI-EXO-M02), anti-CD81 (Santa Cruz, sc-166029), anti-CD9 (Abcam, ab263019), anti-GFP (Sigma, SAB4301138), anti-HaloTag (Promega, G9281), anti- $\beta$ -actin (Thermo Fisher Scientific, MA1-140), HRP-conjugated goat anti-mouse IgG (Millipore, 12-349), HRP-conjugated goat anti-rabbit IgG (Sigma-Aldrich, A0545), HRP-conjugated donkey anti-rabbit IgG (Cytiva, NA934), anti-FAK (Abcam, ab40794), anti-Phospho-FAK(Tyr861) (Invitrogen, 44-626G), anti-CD29 (BD, 610467), anti-active form of integrin beta 1 (HUTS-4, Millipore), anti-Talin (GeneTEX, 97H6), Alexa488 conjugated anti-mouse-IgG (abcam, ab150077), Rhodamine conjugated anti-rabbit IgG (55666, Cappel), anti-Caveolin-1 (BD Transduction Laboratories, Clone 2297), anti-Galectin3 (eBioscience, eBioM3/38), Alexa Fluor 488 conjugated secondary antibody against rat IgG (Thermo Fisher Scientific, A21208) |
| Validation      | Validation was based on the data sheet of manufacturers and researchers. If necessary, additional validation was performed largely by Western blot and/or immunofluorescence.                                                                                                                                                                                                                                                                                                                                                                                                                                                                                                                                                                                                                                                                                                                                  |

## Eukaryotic cell lines

Policy information about [cell lines and Sex and Gender in Research](#)

|                                                                   |                                                                                                                                                                                                                                                                                                                                                                                                      |
|-------------------------------------------------------------------|------------------------------------------------------------------------------------------------------------------------------------------------------------------------------------------------------------------------------------------------------------------------------------------------------------------------------------------------------------------------------------------------------|
| Cell line source(s)                                               | Human prostate cancer (PC-3; RL-1435), Human fibroblast (WI-38; CL-75), and Human prostate (PZ-HPV-7; RL-2221) cells obtained from ATCC. Human mesenchymal stem cells (MSCs; PT-2501; Lot 23TL142784) obtained from Lonza. MDA-MB-231 human breast cancer organotropic line 4175-LuT cells (kindly provided by Dr. Joan Massagué (Memorial Sloan Kettering Cancer Center (MSKCC), New York, NY, USA) |
| Authentication                                                    | N.A.                                                                                                                                                                                                                                                                                                                                                                                                 |
| Mycoplasma contamination                                          | Confirm that all cell lines were tested negative for mycoplasma contaminations                                                                                                                                                                                                                                                                                                                       |
| Commonly misidentified lines (See <a href="#">ICLAC</a> register) | N.A.                                                                                                                                                                                                                                                                                                                                                                                                 |

## Plants

|                       |      |
|-----------------------|------|
| Seed stocks           | N.A. |
| Novel plant genotypes | N.A. |
| Authentication        | N.A. |

## Flow Cytometry

## Plots

|                                                                                                                                                                                         |  |
|-----------------------------------------------------------------------------------------------------------------------------------------------------------------------------------------|--|
| Confirm that:                                                                                                                                                                           |  |
| <input checked="" type="checkbox"/> The axis labels state the marker and fluorochrome used (e.g. CD4-FITC).                                                                             |  |
| <input checked="" type="checkbox"/> The axis scales are clearly visible. Include numbers along axes only for bottom left plot of group (a 'group' is an analysis of identical markers). |  |
| <input checked="" type="checkbox"/> All plots are contour plots with outliers or pseudocolor plots.                                                                                     |  |
| <input checked="" type="checkbox"/> A numerical value for number of cells or percentage (with statistics) is provided.                                                                  |  |

## Methodology

Sample preparation

To quantify mGFP and Halo expression, cells were stained with 100 nM TMR-labeled Halo ligand for 30 minutes. After washing with culture medium and PBS, cells were harvested using cell scrapers and centrifuged at 1,400 g for 3 minutes.

Instrument

FACS Melody (BD Biosciences)

Software

FlowJo (BD Biosciences)

Cell population abundance

The purity of fluorescently labeled cell within post-sort fraction (> 95%) was determined analyzing the sorted cells in a cytometer instrument just after their sorting.

Gating strategy

1.) SSC vs. FSC gating to exclude debris. 2.) FSC-H vs. FSC-A gating to exclude doublets.  
3.) EGFP vs. TMR gating to quantify EGFP+ and Halo7+ cells.  
Boundaries for Gate 3 were based on a intact cell control.

☐ Tick this box to confirm that a figure exemplifying the gating strategy is provided in the Supplementary Information.
